# Supplementary material
Source: MDPI journal article supplement (https://www.mdpi.com/2073-4344/14/4/225)
Supplement: s1 [file s1]

Supplementary materials for

# Bimetallic Pt-IrO<sub>x</sub>/g-C<sub>3</sub>N<sub>4</sub> photocatalysts for the highly efficient overall water splitting under visible light

Nikolay D. Sidorenko <sup>1</sup>, Polina A. Topchiyan <sup>1,2</sup>, Andrey A. Saraev <sup>1</sup>, Evgeny Yu. Gerasimov <sup>1</sup>, Angelina V. Zhurenok <sup>1</sup>, Danila B. Vasilchenko <sup>1,2</sup> and Ekaterina A. Kozlova <sup>1,\*</sup>

<sup>1</sup> Federal Research Center Boreskov Institute of Catalysis 630090 Novosibirsk, Russia; n.sidorenko@g.nsu.ru (N.D.S.), asaraev@catalysis.ru (A.A.S.), gerasimov@catalysis.ru (E.Y.G.), angelinazhurenok@gmail.com (A.V.Z).

<sup>2</sup> Nikolaev Institute of Inorganic Chemistry, Siberian Branch of the Russian Academy of Science, 630090 Novosibirsk, Russian Federation; topchiyan@niic.nsc.ru (P.A.T), vasilchenko@niic.nsc.ru (D.B.V).

\* Correspondence: kozlova@catalysis.ru

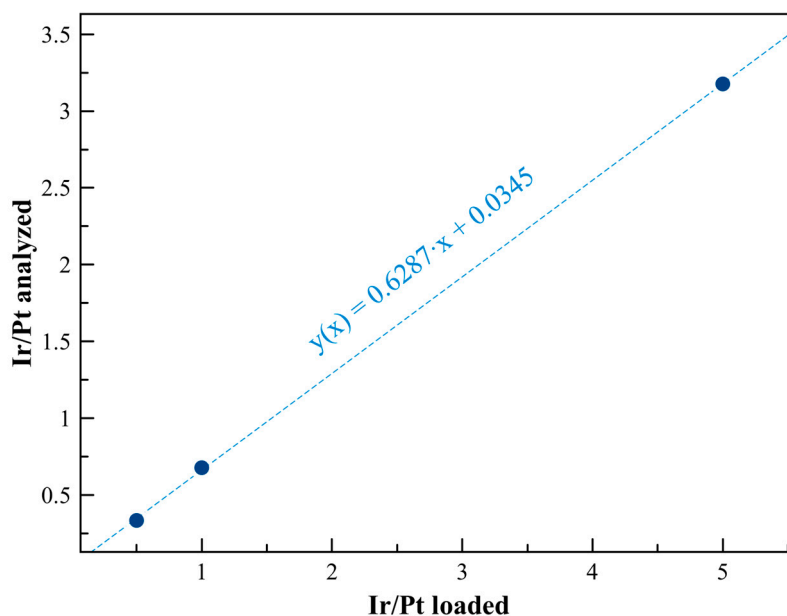

**Figure S1.** Correlation between loaded Ir:Pt ratios and the same value determined with ICP AES chemical analysis in the as prepared Ir<sub>x</sub>Pt<sub>0.1</sub>/g-C<sub>3</sub>N<sub>4</sub>(1) catalysts (x = 0.5, 0.1, 0.01).

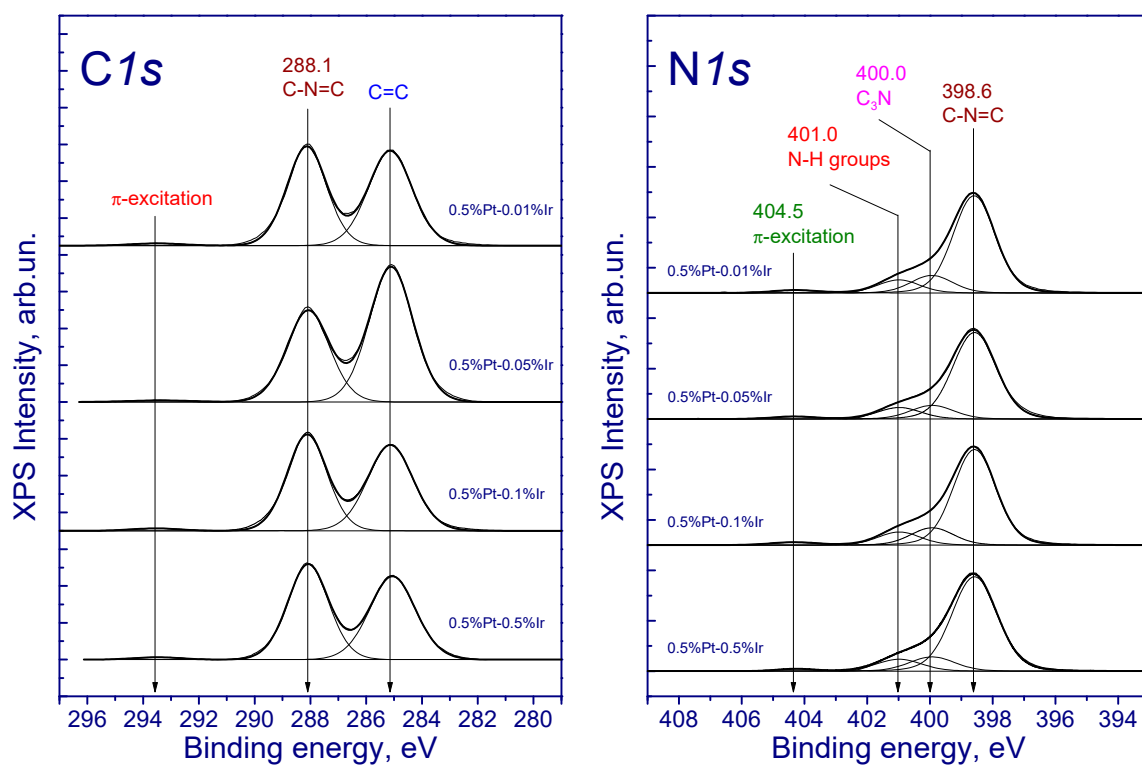

**Figure S2.** C1s and N1s core-level spectra of photocatalysts. The N1s spectra are normalized to the integral intensity of the C1s peaks corresponding to the spectrum of g-C<sub>3</sub>N<sub>4</sub>.

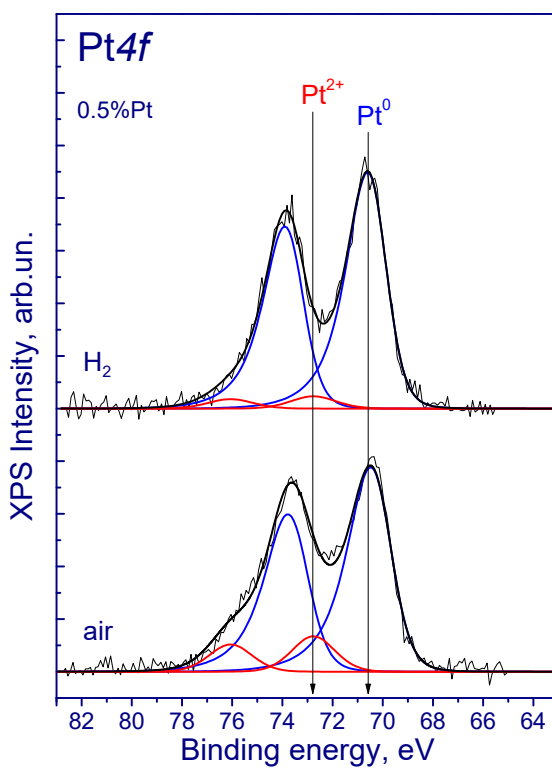

**Figure S3.** XPS spectra of Pt4f of the photocatalysts Pt<sub>0.5</sub>/g-C<sub>3</sub>N<sub>4</sub> after treatment and hydrogen and consecutive treatment in air. Spectra are normalized to the integral peak intensity C1s corresponding to the carrier spectrum (g-C<sub>3</sub>N<sub>4</sub>).

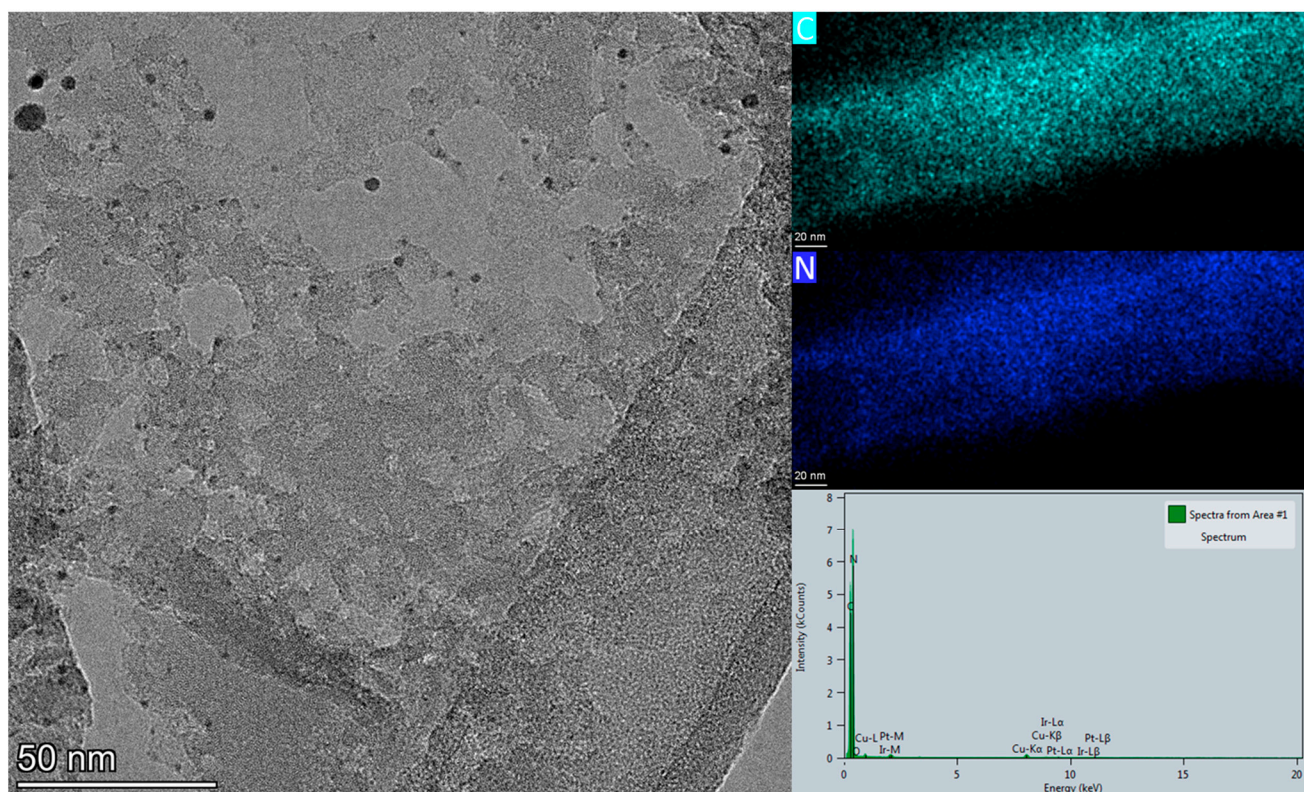

**Figure S4.** HR-TEM of the  $\text{Ir}_{0.5}\text{Pt}_{0.5}/\text{g-C}_3\text{N}_4(1)$  photocatalyst, EDS mapping of the C and N elements in the  $\text{Ir}_{0.5}\text{Pt}_{0.5}/\text{g-C}_3\text{N}_4(1)$  photocatalyst and spectrum from EDS mapping.

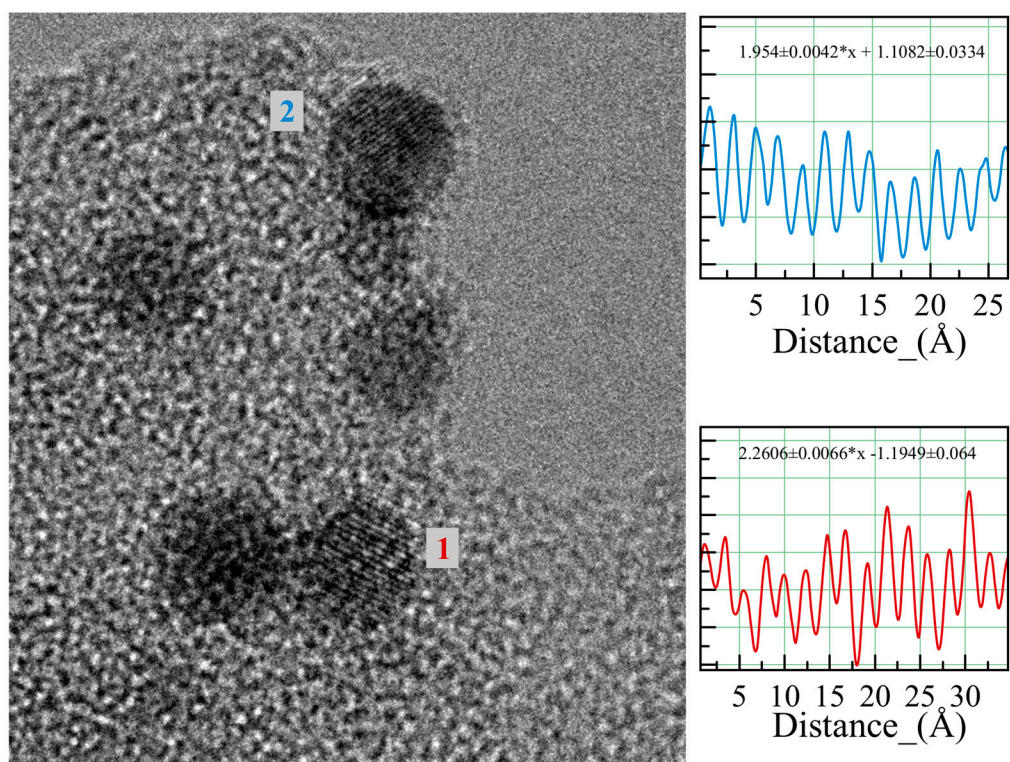

**Figure S5.** Analysis of the interplanar distances observed in HR-TEM micrographs of Pt nanoparticles in the  $\text{Ir}_{0.5}\text{Pt}_{0.5}/\text{g-C}_3\text{N}_4(1)$  photocatalyst.

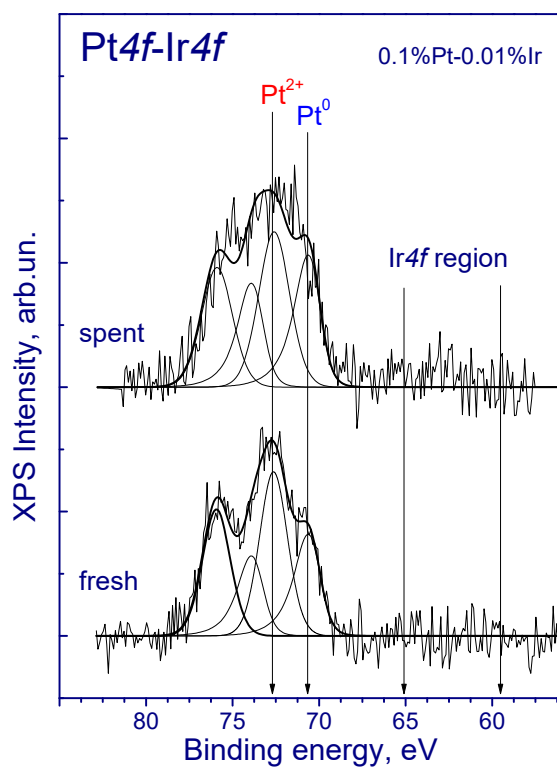

**Figure S6.** XPS spectra of Pt4f and Ir4f of the spent and fresh Ir<sub>0.01</sub>Pt<sub>0.1</sub>/g-C<sub>3</sub>N<sub>4</sub>(1) photocatalyst. Spectra are normalized to the integral peak intensity C1s corresponding to the carrier spectrum (g-C<sub>3</sub>N<sub>4</sub>).

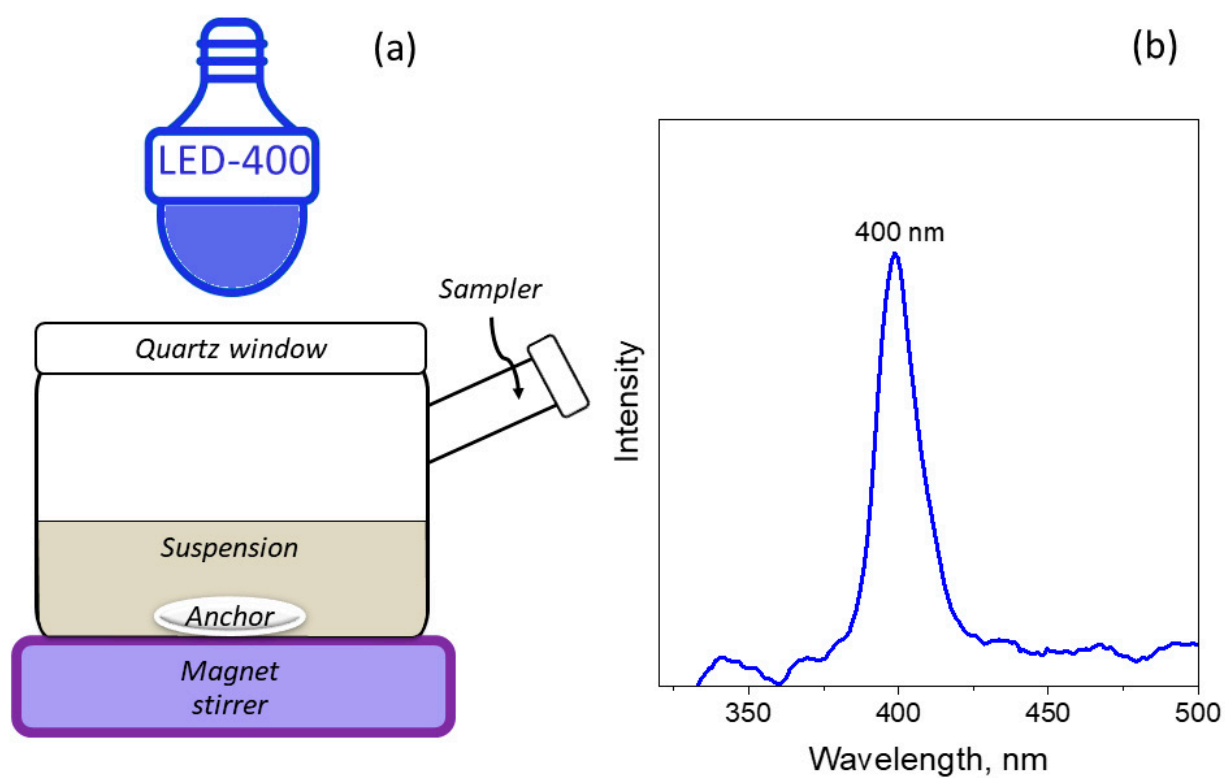

**Figure S7.** (a) The scheme of photocatalytic reactor utilized in this work and (b) the spectrum of 400 nm LED used for irradiation of catalysts suspensions.

**Table S1.** The percentage composition of all elements calculated from spectrum from EDS mapping.

| Element | Mass fraction, % | Mass error, % |
|---------|------------------|---------------|
| C       | 47.87            | 4.91          |
| N       | 51.06            | 11.48         |
| O       | 0.00             | 0.02          |
| Ir      | 0.13             | 0.14          |
| Pt      | 0.94             | 0.14          |

**Table S2.** Data on the photocatalytic hydrogen and oxygen evolution from water without the addition of electron donors.

| Photocatalyst                                                               | Experimental conditions                                               | Light source                                                             | Activity, $\mu\text{mol H}_2 \text{ g}_{\text{cat}}^{-1} \text{ h}^{-1}$ | Activity, $\mu\text{mol O}_2 \text{ g}_{\text{cat}}^{-1} \text{ h}^{-1}$ | Ref. |
|-----------------------------------------------------------------------------|-----------------------------------------------------------------------|--------------------------------------------------------------------------|--------------------------------------------------------------------------|--------------------------------------------------------------------------|------|
| 3%Pt/0.5%CoP/g-C <sub>3</sub> N <sub>4</sub>                                | deionized H <sub>2</sub> O<br>100 ml<br>pH = 3<br>photocatalyst 28 mg | 300 W Xe<br>lamp with<br>cut-off filter<br>$\lambda > 420 \text{ nm}$    | 14.7                                                                     | 7.4                                                                      | [8]  |
| CdS/1.3% Ni <sub>2</sub> P/g-C <sub>3</sub> N <sub>4</sub>                  | ultrapure H <sub>2</sub> O<br>50 ml<br>photocatalyst 50 mg            | 300 W Xe<br>lamp with<br>cut-off filter<br>$\lambda > 420 \text{ nm}$    | 11.2                                                                     | 5.5                                                                      | [13] |
| 3%Pt/10%MnO <sub>2</sub> /g-C <sub>3</sub> N <sub>4</sub>                   | pure H <sub>2</sub> O<br>100 ml<br>photocatalyst 20 mg                | 300 W Xe<br>lamp with<br>cut-off filter<br>$\lambda > 400 \text{ nm}$    | 60.6                                                                     | 28.9                                                                     | [3]  |
| 3%Pt/BiVO <sub>4</sub> /g-C <sub>3</sub> N <sub>4</sub>                     | pure H <sub>2</sub> O<br>100 ml<br>photocatalyst 100 mg               | 300 W Xe<br>lamp with<br>cut-off filter<br>$\lambda > 420 \text{ nm}$    | 156                                                                      | 73                                                                       | [44] |
| 1%Pt/g-C <sub>3</sub> N <sub>4</sub> /ITO/Co-BiVO <sub>4</sub>              | pure H <sub>2</sub> O<br>100 ml<br>photocatalyst 30 mg                | 300 W Xe<br>lamp                                                         | 95.4                                                                     | 40.2                                                                     | [45] |
| 0.5%Pt/0.13%Co/g-C <sub>3</sub> N <sub>4</sub>                              | pure H <sub>2</sub> O<br>50 ml<br>photocatalyst 20 mg                 | 300 W Xe<br>lamp with<br>cut-off filter<br>$\lambda > 400 \text{ nm}$    | 85.7                                                                     | 21.3                                                                     | [46] |
| 7%Co <sub>0.6</sub> Ni <sub>1.4</sub> P/CdS/g-C <sub>3</sub> N <sub>4</sub> | pure H <sub>2</sub> O<br>100 ml<br>photocatalyst 30 mg                | 300 W Xe<br>lamp with<br>cut-off filter<br>$\lambda \geq 420 \text{ nm}$ | 122.0                                                                    | 57.5                                                                     | [47] |
| 1%Pt/3%IrO <sub>2</sub> /g-C <sub>3</sub> N <sub>4</sub>                    | distilled H <sub>2</sub> O<br>100 ml<br>photocatalyst 50 mg           | 300 W Xe<br>lamp with<br>cut-off filter<br>$\lambda \geq 420 \text{ nm}$ | 101                                                                      | 49.1                                                                     | [6]  |

**Table S3.** Data on the photocatalytic hydrogen and peroxide evolution from pure water presented in the literature.

| Photocatalyst                                                              | Experimental conditions                        | Light source                                                                                                        | Activity, $\mu\text{mol H}_2 \text{ g}_{\text{cat}}^{-1} \text{ h}^{-1}$                                                                        | Activity, $\mu\text{mol H}_2\text{O}_2 \text{ g}_{\text{cat}}^{-1} \text{ h}^{-1}$                                                                                  | Ref. |
|----------------------------------------------------------------------------|------------------------------------------------|---------------------------------------------------------------------------------------------------------------------|-------------------------------------------------------------------------------------------------------------------------------------------------|---------------------------------------------------------------------------------------------------------------------------------------------------------------------|------|
| 64 wt.% CdS@ZnIn <sub>2</sub> S <sub>4</sub>                               | 100 ml pure water<br>15 mg photocatalyst       | Xe lamp<br>300 W<br>with filter<br>$\lambda > 400$ nm                                                               | 540.3                                                                                                                                           | 604.8                                                                                                                                                               | [54] |
| 8.3 wt.% carbon dots/CoP                                                   | 20 ml ultrapure water<br>10 mg photocatalyst   | White LED<br>(420 nm $\leq \lambda < 700$ nm)                                                                       | 239.0                                                                                                                                           | 466.0                                                                                                                                                               | [52] |
| 0.5 wt.% CoO/TiO <sub>2</sub> /SiO <sub>2</sub>                            | 25 ml ultrapure water<br>40 mg photocatalyst   | White LED<br>(420 nm $\leq \lambda < 700$ nm, 5 W)                                                                  | 1460.0 $\mu\text{mol H}_2 \text{ g}_{\text{CoO}}^{-1} \text{ h}^{-1}$<br>(7.30 $\mu\text{mol H}_2 \text{ g}_{\text{cat}}^{-1} \text{ h}^{-1}$ ) | 1390.0 $\mu\text{mol H}_2\text{O}_2 \text{ g}_{\text{CoO}}^{-1} \text{ h}^{-1}$<br>(6.95 $\mu\text{mol H}_2\text{O}_2 \text{ g}_{\text{cat}}^{-1} \text{ h}^{-1}$ ) | [18] |
| 1 wt.% Pt/1.45 wt.% Na <sup>+</sup> -doped-g-C <sub>3</sub> N <sub>4</sub> | 200 ml deionized water<br>200 mg photocatalyst | Sodium lamp<br>high-pressure<br>250 W<br>(400 $< \lambda < 800$ nm)                                                 | 900.0                                                                                                                                           | 880.0 $\mu\text{mol H}_2\text{O}_2 \text{ g}_{\text{cat}}^{-1}$<br>(146.7 $\mu\text{mol H}_2\text{O}_2 \text{ g}_{\text{cat}}^{-1} \text{ h}^{-1}$ )                | [24] |
| 1 wt.% Pt/2.3 wt.% K <sup>+</sup> -doped-g-C <sub>3</sub> N <sub>4</sub>   | 200 ml deionized water<br>200 mg photocatalyst | Sodium lamp<br>high-pressure<br>250 W<br>(400 $< \lambda < 800$ nm)                                                 | 550.0                                                                                                                                           | 620.0 $\mu\text{mol H}_2\text{O}_2 \text{ g}_{\text{cat}}^{-1}$<br>(103.3 $\mu\text{mol H}_2\text{O}_2 \text{ g}_{\text{cat}}^{-1} \text{ h}^{-1}$ )                | [20] |
| Co <sub>x</sub> P/P-doped-g-C <sub>3</sub> N <sub>4</sub> (x=1 or 2)       | 80 ml pure water<br>50 mg photocatalyst        | 300 W Xe lamp<br>(incident light density = 450 mW/cm <sup>2</sup> )<br>with cut off filter<br>$\lambda \geq 420$ nm | 75.0 $\mu\text{mol H}_2$<br>(300.0 $\mu\text{mol H}_2 \text{ g}_{\text{cat}}^{-1} \text{ h}^{-1}$ )                                             | 70.0 $\mu\text{mol H}_2\text{O}_2$<br>(280.0 $\mu\text{mol H}_2\text{O}_2 \text{ g}_{\text{cat}}^{-1} \text{ h}^{-1}$ )                                             | [48] |
| Au nanoparticles/Oxygen vacancies BiOBr/TiO <sub>2</sub> (P25)             | 100 ml deionized water<br>50 mg photocatalyst  | Xe lamp<br>300 W                                                                                                    | 384.0                                                                                                                                           | 200.0                                                                                                                                                               | [55] |
| Ni <sub>2</sub> P/carbon dots-x (x=20 mg)                                  | 20 ml ultrapure water<br>10 mg photocatalyst   | $\lambda > 420$ nm                                                                                                  | 256.6                                                                                                                                           | 1281.4                                                                                                                                                              | [49] |
| 3% Co-doped-mesoporous g-C <sub>3</sub> N <sub>4</sub>                     | 25 ml ultrapure water<br>10 mg photocatalyst   | White LED                                                                                                           | 1.82 $\mu\text{mol H}_2 \text{ h}^{-1}$                                                                                                         | 1.65 $\mu\text{mol H}_2\text{O}_2 \text{ h}^{-1}$                                                                                                                   | [53] |

|                                                                         |                                          | (420 nm $\leq$<br>$\lambda < 700$<br>nm)<br>Xe lamp<br>300 W<br>with cut<br>off filter $\lambda$<br>> 325 nm | (182.0 $\mu\text{mol}$<br>$\text{H}_2 \text{ g}_{\text{cat}}^{-1} \text{h}^{-1}$ ) | (165.0 $\mu\text{mol}$<br>$\text{H}_2\text{O}_2 \text{ g}_{\text{cat}}^{-1} \text{h}^{-1}$ ) |      |
|-------------------------------------------------------------------------|------------------------------------------|--------------------------------------------------------------------------------------------------------------|------------------------------------------------------------------------------------|----------------------------------------------------------------------------------------------|------|
| 5% black P<br>nanodots/ $\text{Ti}_3\text{C}_2\text{T}_x@ \text{TiO}_2$ | 100 ml pure water<br>10 mg photocatalyst |                                                                                                              | 564.8                                                                              | 400.0                                                                                        | [50] |
| 1 wt.% Ni/3 wt.% CoP/<br>P-doped-g- $\text{C}_3\text{N}_4$              | 60 ml water<br>50 mg photocatalyst       | Xe lamp                                                                                                      | 124.0                                                                              | 447.0                                                                                        | [51] |
